# Supplementary material for: Considerations for the Retirement of Therapy Animals
Source: MDPI journal article supplement (doi:10.3390/ani9121100), 2019-12-09
Supplement: s1 [file s1]

## Supplementary Materials

**Table S1: Therapy Animal Quality of Life Scale**

Place a check mark for what is most accurate for your therapy animal at the current moment. The healthy animal should be free of clinical disease or pain.

|                                                                                                                                                                                                         | Strongly Disagree | Disagree | Neutral | Agree | Strongly Agree |              |
|---------------------------------------------------------------------------------------------------------------------------------------------------------------------------------------------------------|-------------------|----------|---------|-------|----------------|--------------|
| <b>Sociability</b><br>The animal is engaged, seeks attention, and stays engaged with people                                                                                                             |                   |          |         |       |                |              |
| <b>Enthusiasm for work</b><br>The animal appears excited to travel, wear any working apparel/equipment, or observe any cues that he/she is going to work                                                |                   |          |         |       |                |              |
| <b>Playfulness</b><br>The animal spontaneously engages in play                                                                                                                                          |                   |          |         |       |                |              |
| <b>Energy level</b><br>The animal exhibits an appropriate level of energy for the activity he/she is engaging in                                                                                        |                   |          |         |       |                |              |
| <b>Rest</b><br>The animal sleeps with ease and appears alert and well rested when awake                                                                                                                 |                   |          |         |       |                |              |
| <b>Mobility</b><br>The animal walks, runs, jumps, rises, and lies down with ease                                                                                                                        |                   |          |         |       |                |              |
| <b>Appetite</b><br>The animal has a regular and consistent appetite                                                                                                                                     |                   |          |         |       |                |              |
| <b>Predictable eliminations</b><br>The animal urinates and defecates when expected without accidents or incontinence                                                                                    |                   |          |         |       |                |              |
| <b>Obedience</b><br>The animal responds to commands immediately and consistently                                                                                                                        |                   |          |         |       |                |              |
| <b>Minimal displays of stress signals</b><br>The animal does not exhibit signs of stress (ie., excessive lip licking, yawning, pacing, crouching, circling, whale eye, paw lifting) during work or rest |                   |          |         |       |                |              |
| <b>Total number of checks</b>                                                                                                                                                                           |                   |          |         |       |                |              |
| <b>Multiply by</b>                                                                                                                                                                                      | 0                 | 2.5      | 5       | 7.5   | 10             | <b>Total</b> |
| <b>Total</b>                                                                                                                                                                                            | +                 | +        | +       | +     | =              |              |

The survey should be taken while the animal is in optimal working capacity to provide a baseline score and then retaken when retirement is in question. The maximum total score is 100. A decrease of 25% or more from baseline score warrants consideration for cessation of work and retirement.
